# Supplementary material for: Infrared spectra and fragmentation dynamics of isotopologue-selective mixed-ligand complexes
Source: Royal Society of Chemistry journal article supplement (doi:10.1039/d4cp00978a), 2024-01-01
Supplement: d4cp00978a1.pdf [file d4cp00978a1.pdf]

# Infrared spectra and fragmentation dynamics of isotopologue-selective mixed-ligand complexes

*Peter D. Watson,<sup>1</sup> Gabriele Meizyte,<sup>1</sup> Philip A. J. Pearcy,<sup>1</sup> Edward I. Brewer,<sup>1</sup> Alice E. Green,<sup>1</sup>  
Christopher Robertson,<sup>2</sup> Martin J. Paterson,<sup>2</sup> and Stuart R. Mackenzie<sup>1\*</sup>*

<sup>1</sup> Department of Chemistry, University of Oxford, Physical and Theoretical Chemistry  
Laboratory, South Parks Road, Oxford, United Kingdom, OX1 3QZ

<sup>2</sup> School of Engineering & Physical Sciences, Heriot-Watt University, Edinburgh, Scotland, EH14  
4AS

## Supporting Information

# Contents:

|                                                                                                                                                                   |    |
|-------------------------------------------------------------------------------------------------------------------------------------------------------------------|----|
| Table S1: Cartesian coordinates of $\text{Au}(\text{CO})_n(\text{N}_2\text{O})_m^+$ complexes.....                                                                | 3  |
| Table S2: Calculated Frequencies for isotopically substituted $\text{Au}(^{13/12}\text{CO})_2(\text{N}_2\text{O})^+$ complexes.....                               | 4  |
| Table S3: Calculated Frequencies for isotopically substituted $\text{Au}(^{13/12}\text{CO})_3(\text{N}_2\text{O})^+$ complexes.....                               | 5  |
| Table S4: Calculated Frequencies for isotopically substituted $\text{Au}(^{13/12}\text{CO})_3(\text{N}_2\text{O})_2^+$ complexes.....                             | 7  |
| Table S5: Relative total fragmentation yields for isotopically substituted $\text{Au}(^{12/13}\text{CO})_3(\text{N}_2\text{O})_m^+$ ( $m = 1, 2$ ) complexes..... | 8  |
| Figure S1: Representative portion of the $\text{Au}(^{13}\text{CO})_n(\text{N}_2\text{O})_m^+$ mass spectrum.....                                                 | 9  |
| Figure S2: Representative mass spectra showing the isotopologue distribution with increasing $^{13}\text{CO}$ concentration                                       | 10 |
| Figure S3: Representative mass spectra of the $\text{Au}(^{13/12}\text{CO})_3(\text{N}_2\text{O})^+$ illustrating photofragmentation.....                         | 11 |
| Figure S4: Representative mass spectra of the $\text{Au}(^{13/12}\text{CO})_3(\text{N}_2\text{O})_2^+$ illustrating photofragmentation .....                      | 12 |
| Figure S5: Comparison of experimental and simulated infrared action spectra of $\text{Au}(^{13/12}\text{CO})_2(\text{N}_2\text{O})^+$ complexes.....              | 13 |
| Figure S6: Comparison of experimental and simulated infrared action spectra of $\text{Au}(^{13/12}\text{CO})_3(\text{N}_2\text{O})^+$ complexes.....              | 14 |
| Figure S7: Comparison of experimental and simulated infrared action spectra of $\text{Au}(^{13/12}\text{CO})_3(\text{N}_2\text{O})_2^+$ complexes....             | 15 |
| Figure S8: Potential energy surface cuts.....                                                                                                                     | 16 |

**Table S1:** Cartesian coordinates of Au(CO)<sub>n</sub>(N<sub>2</sub>O)<sub>m</sub><sup>+</sup> complexes in both low symmetry (C<sub>1</sub>) and enforced higher symmetry (C<sub>2v</sub>, C<sub>3v</sub> and D<sub>3h</sub>).

| C2N1 | C <sub>1</sub> |           |           | C <sub>2v</sub> |           |           |
|------|----------------|-----------|-----------|-----------------|-----------|-----------|
| Au   | -0.692469      | 0.038511  | 0.000005  | 0.000000        | 0.000000  | 0.692605  |
| C    | -0.570813      | 2.020114  | -0.000123 | 0.000000        | 1.981950  | 0.779194  |
| O    | -0.507316      | 3.132274  | 0.000063  | 0.000000        | 3.094626  | 0.833871  |
| C    | -0.983585      | -1.922371 | -0.000123 | 0.000000        | -1.981950 | 0.779194  |
| O    | -1.155117      | -3.023144 | 0.000063  | 0.000000        | -3.094626 | 0.833871  |
| O    | 4.608706       | -0.301456 | -0.000015 | 0.000000        | 0.000000  | -4.616481 |
| N    | 3.449621       | -0.198871 | 0.000006  | 0.000000        | 0.000000  | -2.329437 |
| N    | 2.330563       | -0.099730 | 0.000022  | 0.000000        | 0.000000  | -3.452875 |

| C3N1 | C <sub>1</sub> |           |           | C <sub>3v</sub> |           |           |
|------|----------------|-----------|-----------|-----------------|-----------|-----------|
| Au   | -0.617366      | -0.001192 | -0.001168 | 0.000000        | 0.000000  | 0.617473  |
| C    | -0.671275      | -1.945370 | 0.683188  | 0.000000        | 2.061283  | 0.675590  |
| O    | -0.707644      | -2.998729 | 1.053692  | 0.000000        | 3.177813  | 0.714163  |
| C    | -0.666742      | 0.377717  | -2.027731 | -1.785124       | -1.030642 | 0.675590  |
| O    | -0.700441      | 0.582798  | -3.125426 | -2.752067       | -1.588907 | 0.714163  |
| C    | -0.688270      | 1.564487  | 1.338901  | 1.785124        | -1.030642 | 0.675590  |
| O    | -0.734068      | 2.412482  | 2.064787  | 2.752067        | -1.588907 | 0.714163  |
| O    | 4.646397       | 0.008400  | 0.010753  | 0.000000        | 0.000000  | -4.647038 |
| N    | 3.482630       | 0.006282  | 0.008119  | 0.000000        | 0.000000  | -2.360108 |
| N    | 2.359613       | 0.004231  | 0.005547  | 0.000000        | 0.000000  | -3.483412 |

| C3N2 | C <sub>1</sub> |           |           | D <sub>3h</sub> |           |           |
|------|----------------|-----------|-----------|-----------------|-----------|-----------|
| Au   | -0.000315      | 0.001423  | -0.001546 | 0.000000        | 0.000000  | 0.000000  |
| C    | -0.004118      | 0.764599  | -1.913965 | 0.000000        | 2.059158  | 0.000000  |
| O    | -0.006088      | 1.179199  | -2.951874 | 0.000000        | 3.176813  | 0.000000  |
| C    | 0.001025       | -2.036463 | 0.293939  | 1.783283        | -1.029579 | 0.000000  |
| O    | 0.002515       | -3.142604 | 0.453927  | 2.751201        | -1.588407 | 0.000000  |
| C    | 0.003327       | 1.276368  | 1.615503  | -1.783283       | -1.029579 | 0.000000  |
| O    | 0.005714       | 1.968440  | 2.493094  | -2.751201       | -1.588407 | 0.000000  |
| O    | 5.416425       | -0.004376 | 0.005337  | 0.000000        | 0.000000  | 5.416255  |
| N    | 4.251328       | -0.004078 | 0.001995  | 0.000000        | 0.000000  | 3.128067  |
| N    | 3.128244       | -0.003903 | -0.001307 | 0.000000        | 0.000000  | 4.251156  |
| O    | -5.416135      | -0.006810 | 0.006568  | 0.000000        | 0.000000  | -5.416255 |
| N    | -4.251040      | -0.003884 | 0.006394  | 0.000000        | 0.000000  | -3.128067 |
| N    | -3.127951      | -0.001027 | 0.006184  | 0.000000        | 0.000000  | -4.251156 |

**Table S2:** Calculated Frequencies for isotopically substituted Au(<sup>13/12</sup>CO)<sub>2</sub>(N<sub>2</sub>O)<sup>+</sup> complexes. Frequencies are ordering by descending symmetry label where appropriate and nominal descriptive assignments of the modes are provided. Modes associated with N<sub>2</sub>O are scaled with respect to the N=N stretch in free N<sub>2</sub>O stretch (2223.5cm<sup>-1</sup>, SF = 0.9322) and CO modes are scaled to experiment (SF = 0.9674).

| Alt                   |       |                                            |            |                                             |        |                                                                          |        |                                             |        |  |
|-----------------------|-------|--------------------------------------------|------------|---------------------------------------------|--------|--------------------------------------------------------------------------|--------|---------------------------------------------|--------|--|
| Symm                  | Freq. | Assignment                                 | Symm       | <sup>12</sup> C <sup>2</sup> N <sup>1</sup> | Scaled | <sup>12</sup> C <sup>1</sup> <sup>13</sup> C <sup>1</sup> N <sup>1</sup> | Scaled | <sup>13</sup> C <sup>2</sup> N <sup>1</sup> | Scaled |  |
| <b>7a<sub>1</sub></b> | 2397  | N <sub>2</sub> O asymm. stretch            | <i>a</i>   | 2397                                        | 2234   | 2397                                                                     | 2254   | 2397                                        | 2234   |  |
| <b>6a<sub>1</sub></b> | 2344  | CO symm. stretch                           | <i>a</i>   | 2344                                        | 2267   | 2330                                                                     | 2234   | 2289                                        | 2214   |  |
| <b>5a<sub>1</sub></b> | 1403  | N <sub>2</sub> O symm. stretch             | <i>a</i>   | 1403                                        | 1308   | 1403                                                                     | 1308   | 1403                                        | 1308   |  |
| <b>4a<sub>1</sub></b> | 406   | OCAu symm. in-plane bend                   | <i>a</i>   | 406                                         | 393    | 401                                                                      | 388    | 396                                         | 383    |  |
| <b>3a<sub>1</sub></b> | 399   | CAuC symm. stretch                         | <i>a</i>   | 399                                         | 386    | 395                                                                      | 382    | 390                                         | 377    |  |
| <b>2a<sub>1</sub></b> | 64    | Au-N <sub>2</sub> O stretch                | <i>a</i>   | 64                                          | 62     | 64                                                                       | 62     | 64                                          | 62     |  |
| <b>1a<sub>1</sub></b> | 48    | Au-N <sub>2</sub> O stretch                | <i>a</i>   | 48                                          | 45     | 48                                                                       | 46     | 48                                          | 45     |  |
| <b>1a<sub>2</sub></b> | 310   | OCAu out-plane out-phase bend              | <i>a</i>   | 311                                         | 300    | 305                                                                      | 296    | 301                                         | 291    |  |
| <b>4b<sub>1</sub></b> | 641   | ONN out-plane bend                         | <i>a</i>   | 641                                         | 597    | 641                                                                      | 597    | 641                                         | 597    |  |
| <b>3b<sub>1</sub></b> | 403   | OCAu symm. out-plane bend                  | <i>a</i>   | 403                                         | 390    | 397                                                                      | 384    | 390                                         | 377    |  |
| <b>2b<sub>1</sub></b> | 62    | CAuC out-plane bend                        | <i>a</i>   | 62                                          | 62     | 62                                                                       | 62     | 62                                          | 62     |  |
| <b>1b<sub>1</sub></b> | 48    | N <sub>2</sub> O inter. out-plane rotation | <i>a</i>   | 48                                          | 46     | 48                                                                       | 45     | 48                                          | 46     |  |
| <b>6b<sub>2</sub></b> | 2306  | CO asymm. stretch                          | <i>a</i>   | 2306                                        | 2231   | 2266                                                                     | 2192   | 2253                                        | 2180   |  |
| <b>5b<sub>2</sub></b> | 642   | ONN in-plane bend                          | <i>a</i>   | 642                                         | 598    | 642                                                                      | 598    | 642                                         | 598    |  |
| <b>4b<sub>2</sub></b> | 357   | CAuC asymm. stretch                        | <i>a</i>   | 357                                         | 345    | 354                                                                      | 342    | 352                                         | 341    |  |
| <b>3b<sub>2</sub></b> | 314   | OCAu in-plane out-phase bend               | <i>a</i>   | 315                                         | 304    | 310                                                                      | 299    | 305                                         | 295    |  |
| <b>2b<sub>2</sub></b> | 39    | N <sub>2</sub> O inter. in-plane rotation  | <i>a</i>   | 39                                          | 37     | 39                                                                       | 37     | 39                                          | 37     |  |
| <b>1b<sub>2</sub></b> | 2i    | N <sub>2</sub> O inter. bend               | <i>a</i>   | 1                                           | 1      | 1                                                                        | 1      | 1                                           | 1      |  |
|                       |       |                                            | <i>zpe</i> | 0.755                                       | 0.720  | 0.750                                                                    | 0.715  | 0.745                                       | 0.710  |  |
|                       |       |                                            | (eV)       |                                             |        |                                                                          |        |                                             |        |  |
|                       |       |                                            |            |                                             |        | $\Delta zpe$ (eV)                                                        | 0.005  |                                             | 0.010  |  |

**Table S3:** Calculated Frequencies for isotopically substituted Au(<sup>13/12</sup>CO)<sub>3</sub>(N<sub>2</sub>O)<sup>+</sup> complexes. Frequencies are ordering by descending symmetry label where appropriate and nominal descriptive assignments of the modes are provided. Modes associated with N<sub>2</sub>O are scaled with respect to the N=N stretch in free N<sub>2</sub>O stretch (2223.5cm<sup>-1</sup>, SF = 0.9322) and CO modes are scaled to experiment (SF = 0.9674).

| Alt                   |       |                                                        |          |                    |        |                                                 |        |                                                              |        |                    |        |  |
|-----------------------|-------|--------------------------------------------------------|----------|--------------------|--------|-------------------------------------------------|--------|--------------------------------------------------------------|--------|--------------------|--------|--|
| Symm                  | Freq. | Assignment                                             | Symm     | <sup>12</sup> C3N1 | Scaled | <sup>12</sup> C <sup>2</sup> <sup>13</sup> C1N1 | Scaled | <sup>12</sup> C <sup>1</sup> <sup>13</sup> C <sup>2</sup> N1 | Scaled | <sup>13</sup> C3N1 | Scaled |  |
| <b>7a<sub>1</sub></b> | 2399  | N <sub>2</sub> O asymm. stretch                        | <i>a</i> | 2400               | 2237   | 2399                                            | 2236   | 2399                                                         | 2236   | 2398               | 2236   |  |
| <b>6a<sub>1</sub></b> | 2300  | (CO) <sub>3</sub> symm. stretch                        | <i>a</i> | 2299               | 2224   | 2293                                            | 2219   | 2286                                                         | 2211   | 2247               | 2173   |  |
| <b>5a<sub>1</sub></b> | 1403  | N <sub>2</sub> O symm. stretch                         | <i>a</i> | 1403               | 1308   | 1403                                            | 1308   | 1403                                                         | 1308   | 1403               | 1308   |  |
| <b>4a<sub>1</sub></b> | 354   | (CO) <sub>3</sub> out-of-plane bend                    | <i>a</i> | 354                | 342    | 350                                             | 339    | 346                                                          | 335    | 342                | 331    |  |
| <b>3a<sub>1</sub></b> | 323   | (CO) <sub>3</sub> symm. inter. stretch                 | <i>a</i> | 324                | 313    | 322                                             | 311    | 320                                                          | 309    | 318                | 308    |  |
| <b>2a<sub>1</sub></b> | 62    | N <sub>2</sub> O inter. stretch, Au-C-O inter. bend    | <i>a</i> | 62                 | 60     | 62                                              | 60     | 62                                                           | 60     | 62                 | 60     |  |
| <b>1a<sub>1</sub></b> | 53    | N <sub>2</sub> O inter. stretch, Au-CO inter. bend     | <i>a</i> | 53                 | 51     | 53                                              | 51     | 53                                                           | 51     | 53                 | 51     |  |
| <b>1a<sub>2</sub></b> | 256   | (CO) <sub>3</sub> symm. inter. bend                    | <i>a</i> | 256                | 248    | 254                                             | 245    | 251                                                          | 243    | 249                | 240    |  |
| <b>8e</b>             | 2275  | (CO) <sub>2</sub> asymm. stretch                       | <i>a</i> | 2275               | 2201   | 2275                                            | 2201   | 2236                                                         | 2163   | 2223               | 2151   |  |
| <b>8e</b>             | 2275  | (CO) <sub>2</sub> asymm. stretch                       | <i>a</i> | 2275               | 2201   | 2229                                            | 2156   | 2223                                                         | 2151   | 2223               | 2151   |  |
| <b>7e</b>             | 641   | N <sub>2</sub> O bend                                  | <i>a</i> | 640                | 597    | 641                                             | 597    | 641                                                          | 597    | 641                | 597    |  |
| <b>7e</b>             | 641   | N <sub>2</sub> O bend                                  | <i>a</i> | 640                | 597    | 641                                             | 597    | 641                                                          | 597    | 641                | 597    |  |
| <b>6e</b>             | 401   | (CO) <sub>3</sub> planar bend                          | <i>a</i> | 401                | 388    | 400                                             | 387    | 396                                                          | 383    | 390                | 377    |  |
| <b>6e</b>             | 401   | (CO) <sub>2</sub> planar bend, CO inter. stretch       | <i>a</i> | 401                | 388    | 395                                             | 382    | 391                                                          | 378    | 390                | 377    |  |
| <b>5e</b>             | 244   | (CO) <sub>3</sub> symm. out-of-plane bend              | <i>a</i> | 244                | 236    | 243                                             | 235    | 241                                                          | 233    | 236                | 229    |  |
| <b>5e</b>             | 244   | (CO) <sub>2</sub> asymm. out-of-plane bend             | <i>a</i> | 243                | 236    | 239                                             | 231    | 236                                                          | 229    | 236                | 228    |  |
| <b>4e</b>             | 214   | (CO) <sub>2</sub> symm. inter. bend, CO inter. stretch | <i>a</i> | 214                | 207    | 213                                             | 206    | 212                                                          | 205    | 210                | 204    |  |
| <b>4e</b>             | 214   | (CO) <sub>2</sub> symm. inter. bend, CO inter. stretch | <i>a</i> | 214                | 207    | 213                                             | 206    | 211                                                          | 205    | 210                | 203    |  |
| <b>3e</b>             | 49    | N <sub>2</sub> O inter. bend                           | <i>a</i> | 48                 | 48     | 49                                              | 49     | 49                                                           | 49     | 49                 | 49     |  |
| <b>3e</b>             | 49    | N <sub>2</sub> O inter. bend                           | <i>a</i> | 48                 | 48     | 49                                              | 49     | 49                                                           | 49     | 49                 | 49     |  |
| <b>2e</b>             | 42    | N <sub>2</sub> O inter. bend                           | <i>a</i> | 41                 | 41     | 43                                              | 42     | 42                                                           | 42     | 42                 | 42     |  |
| <b>2e</b>             | 42    | N <sub>2</sub> O inter. bend                           | <i>a</i> | 41                 | 41     | 42                                              | 42     | 42                                                           | 42     | 42                 | 42     |  |
| <b>1e</b>             | 18    | Au-(CO) <sub>2</sub> inter. twist                      | <i>a</i> | 18                 | 18     | 18                                              | 18     | 18                                                           | 18     | 18                 | 18     |  |
| <b>1e</b>             | 18    | Au-(CO) <sub>2</sub> inter. twist                      | <i>a</i> | 18                 | 18     | 18                                              | 18     | 18                                                           | 18     | 18                 | 18     |  |

|                    |       |       |                      |       |       |       |       |       |
|--------------------|-------|-------|----------------------|-------|-------|-------|-------|-------|
| <i>zpe</i><br>(eV) | 0.924 | 0.884 | 0.920                | 0.879 | 0.915 | 0.875 | 0.911 | 0.870 |
|                    |       |       | $\Delta zpe$<br>(eV) | 0.004 |       | 0.009 |       | 0.013 |

**Table S4** Calculated Frequencies for isotopically substituted Au(<sup>13/12</sup>CO)<sub>3</sub>(N<sub>2</sub>O)<sub>2</sub><sup>+</sup> complexes. Frequencies are ordering by descending symmetry label where appropriate and nominal descriptive assignments of the modes are provided. Modes associated with N<sub>2</sub>O are scaled with respect to the N=N stretch in free N<sub>2</sub>O stretch (2223.5cm<sup>-1</sup>, SF = 0.9322) and CO modes are scaled to experiment (SF = 0.9674).

| Alt               |       |                                                        |      |                    |        |                                                  |        |                                                  |        |                    |        |  |
|-------------------|-------|--------------------------------------------------------|------|--------------------|--------|--------------------------------------------------|--------|--------------------------------------------------|--------|--------------------|--------|--|
| Symm              | Freq. | Assignment                                             | Symm | <sup>12</sup> C3N2 | Scaled | <sup>12</sup> C <sup>12</sup> <sup>13</sup> C1N2 | Scaled | <sup>12</sup> C <sup>13</sup> <sup>13</sup> C2N2 | Scaled | <sup>13</sup> C3N2 | Scaled |  |
| 5a' <sub>1</sub>  | 2396  | In-phase N <sub>2</sub> O asymm. stretch               | a    | 2396               | 2234   | 2396                                             | 2234   | 2396                                             | 2234   | 2396               | 2234   |  |
| 4a' <sub>1</sub>  | 2296  | In-phase CO stretch                                    | a    | 2296               | 2221   | 2290                                             | 2215   | 2282                                             | 2208   | 2243               | 2170   |  |
| 3a' <sub>1</sub>  | 1398  | In-phase N <sub>2</sub> O symm. stretch                | a    | 1398               | 1303   | 1398                                             | 1303   | 1398                                             | 1303   | 1398               | 1303   |  |
| 2a' <sub>1</sub>  | 325   | Symm. Au-(CO) <sub>3</sub> stretch                     | a    | 325                | 325    | 324                                              | 324    | 322                                              | 322    | 320                | 320    |  |
| 1a' <sub>1</sub>  | 51    | Symm. N <sub>2</sub> O inter. stretch                  | a    | 51                 | 51     | 51                                               | 51     | 51                                               | 51     | 51                 | 51     |  |
| 1a' <sub>2</sub>  | 256   | Au-(CO) <sub>3</sub> twist                             | a    | 256                | 247    | 253                                              | 245    | 251                                              | 243    | 248                | 240    |  |
| 7e'               | 2271  | Out-phase CO stretch                                   | a    | 2271               | 2197   | 2271                                             | 2197   | 2232                                             | 2160   | 2219               | 2147   |  |
| 7e'               | 2271  | Out-phase CO stretch                                   | a    | 2271               | 2197   | 2225                                             | 2153   | 2219                                             | 2147   | 2219               | 2147   |  |
| 6e'               | 640   | Out-phase N <sub>2</sub> O bend                        | a    | 640                | 597    | 640                                              | 597    | 640                                              | 597    | 640                | 597    |  |
| 6e'               | 640   | Out-phase N <sub>2</sub> O bend                        | a    | 640                | 597    | 640                                              | 597    | 640                                              | 597    | 640                | 597    |  |
| 5e'               | 403   | C-Au-C scissor                                         | a    | 403                | 390    | 402                                              | 388    | 398                                              | 385    | 392                | 379    |  |
| 5e'               | 403   | C-Au-C rock                                            | a    | 403                | 390    | 397                                              | 384    | 393                                              | 380    | 391                | 379    |  |
| 4e'               | 218   | (CO) <sub>2</sub> symm. inter. bend, CO inter. stretch | a    | 218                | 211    | 217                                              | 210    | 216                                              | 209    | 214                | 207    |  |
| 4e'               | 218   | (CO) <sub>2</sub> symm. inter. bend, CO inter. stretch | a    | 218                | 211    | 217                                              | 210    | 216                                              | 209    | 214                | 207    |  |
| 3e'               | 48    | Au-(CO) <sub>2</sub> bend, N <sub>2</sub> O rotation   | a    | 48                 | 48     | 48                                               | 48     | 48                                               | 48     | 48                 | 48     |  |
| 3e'               | 48    | Au-(CO) <sub>2</sub> bend, N <sub>2</sub> O rotation   | a    | 48                 | 48     | 48                                               | 48     | 48                                               | 48     | 48                 | 48     |  |
| 2e'               | 38    | In-phase N <sub>2</sub> O rotation                     | a    | 38                 | 38     | 38                                               | 38     | 38                                               | 38     | 38                 | 38     |  |
| 2e'               | 38    | In-phase N <sub>2</sub> O rotation                     | a    | 38                 | 38     | 38                                               | 38     | 38                                               | 38     | 38                 | 38     |  |
| 1e'               | 7     | N <sub>2</sub> O-Au-N <sub>2</sub> O inter. bend       | a    | 7                  | 6      | 7                                                | 7      | 7                                                | 7      | 7                  | 7      |  |
| 1e'               | 7     | N <sub>2</sub> O-Au-N <sub>2</sub> O inter. bend       | a    | 7                  | 6      | 7                                                | 6      | 7                                                | 6      | 7                  | 6      |  |
| 4a'' <sub>2</sub> | 2393  | Out-phase N <sub>2</sub> O asymm. stretch              | a    | 2393               | 2231   | 2393                                             | 2231   | 2393                                             | 2231   | 2393               | 2231   |  |
| 3a'' <sub>2</sub> | 1397  | Out-phase N <sub>2</sub> O symm. stretch               | a    | 1397               | 1303   | 1397                                             | 1303   | 1397                                             | 1303   | 1397               | 1303   |  |
| 2a'' <sub>2</sub> | 354   | Au-(CO) <sub>3</sub> wag                               | a    | 354                | 342    | 350                                              | 339    | 346                                              | 335    | 342                | 331    |  |
| 1a'' <sub>2</sub> | 56    | Au-(CO) <sub>3</sub> inter. wag                        | a    | 56                 | 54     | 56                                               | 54     | 56                                               | 54     | 56                 | 54     |  |
| 3e''              | 640   | In-phase N <sub>2</sub> O bend                         | a    | 640                | 597    | 640                                              | 597    | 640                                              | 597    | 640                | 597    |  |
| 3e''              | 640   | In-phase N <sub>2</sub> O bend                         | a    | 640                | 597    | 640                                              | 597    | 640                                              | 597    | 640                | 597    |  |
| 2e''              | 246   | Au-(CO) <sub>2</sub> twist                             | a    | 246                | 238    | 246                                              | 238    | 243                                              | 235    | 238                | 231    |  |
| 2e''              | 246   | Au-(CO) <sub>2</sub> wag                               | a    | 246                | 238    | 241                                              | 233    | 238                                              | 231    | 238                | 231    |  |
| 1e''              | 17    | N <sub>2</sub> O-Au-N <sub>2</sub> O inter. tilt       | a    | 17                 | 16     | 17                                               | 16     | 17                                               | 16     | 17                 | 16     |  |
| 1e''              | 17    | N <sub>2</sub> O-Au-N <sub>2</sub> O inter. tilt       | a    | 17                 | 16     | 17                                               | 16     | 17                                               | 16     | 17                 | 16     |  |

|           |    |                                        |          |       |       |                   |       |       |       |       |       |
|-----------|----|----------------------------------------|----------|-------|-------|-------------------|-------|-------|-------|-------|-------|
| <b>2a</b> | 43 | Asymm. N <sub>2</sub> O inter. stretch | <i>a</i> | 43    | 42    | 43                | 42    | 43    | 42    | 43    | 42    |
| <b>1a</b> | 41 | Out-of-phase N <sub>2</sub> O rotation | <i>a</i> | 41    | 39    | 41                | 39    | 41    | 39    | 41    | 39    |
| <b>1a</b> | 41 | Out-of-phase N <sub>2</sub> O rotation | <i>a</i> | 41    | 39    | 41                | 39    | 41    | 39    | 41    | 39    |
|           |    | <i>zpe</i> (eV)                        |          | 1.246 | 1.184 | 1.242             | 1.180 | 1.237 | 1.175 | 1.232 | 1.171 |
|           |    |                                        |          |       |       | $\Delta zpe$ (eV) | 0.004 |       | 0.009 |       | 0.014 |

**Table S5:** (Right) Relative total fragmentation yields for isotopically substituted Au(<sup>13/12</sup>CO)<sub>3</sub>(N<sub>2</sub>O)<sub>m</sub>+ (m = 1,2) complexes. (Left) Simplified relative total fragmentation yields ignoring isotope labelling.

| Fragmentation Yield                 |                  |                  |                  |                                   |                                   | Simplified                          |      |                  |                     |
|-------------------------------------|------------------|------------------|------------------|-----------------------------------|-----------------------------------|-------------------------------------|------|------------------|---------------------|
| <b>C3N1</b>                         |                  |                  |                  |                                   |                                   |                                     |      |                  |                     |
|                                     | <sup>12</sup> CO | <sup>13</sup> CO | N <sub>2</sub> O | <sup>12</sup> CO,N <sub>2</sub> O | <sup>13</sup> CO,N <sub>2</sub> O |                                     | CO   | N <sub>2</sub> O | CO,N <sub>2</sub> O |
| <sup>12</sup> C3N1                  | 0.77             | 0.00             | 0.15             | 0.08                              | 0.00                              | <sup>12</sup> C3N1                  | 0.77 | 0.15             | 0.08                |
| <sup>13</sup> C1 <sup>12</sup> C2N1 | 0.58             | 0.24             | 0.12             | 0.04                              | 0.02                              | <sup>13</sup> C1 <sup>12</sup> C2N1 | 0.82 | 0.12             | 0.06                |
| <sup>13</sup> C2 <sup>12</sup> C1N1 | 0.28             | 0.49             | 0.14             | 0.03                              | 0.06                              | <sup>13</sup> C2 <sup>12</sup> C1N1 | 0.77 | 0.14             | 0.09                |
| <sup>13</sup> C3N1                  | 0.00             | 0.77             | 0.15             | 0.00                              | 0.09                              | <sup>13</sup> C3N1                  | 0.77 | 0.15             | 0.09                |
| <b>C3N2</b>                         |                  |                  |                  |                                   |                                   |                                     |      |                  |                     |
|                                     | <sup>12</sup> CO | <sup>13</sup> CO | N <sub>2</sub> O | <sup>12</sup> CO,N <sub>2</sub> O | <sup>13</sup> CO,N <sub>2</sub> O |                                     | CO   | N <sub>2</sub> O | CO,N <sub>2</sub> O |
| <sup>12</sup> C3N2                  | 0.56             | 0.00             | 0.33             | 0.11                              | 0.00                              | <sup>12</sup> C3N2                  | 0.56 | 0.33             | 0.11                |
| <sup>13</sup> C1 <sup>12</sup> C2N2 | 0.30             | 0.17             | 0.33             | 0.13                              | 0.07                              | <sup>13</sup> C1 <sup>12</sup> C2N2 | 0.47 | 0.33             | 0.20                |
| <sup>13</sup> C2 <sup>12</sup> C1N2 | 0.20             | 0.29             | 0.33             | 0.07                              | 0.11                              | <sup>13</sup> C2 <sup>12</sup> C1N2 | 0.49 | 0.33             | 0.18                |
| <sup>13</sup> C3N2                  | 0.00             | 0.47             | 0.36             | 0.00                              | 0.17                              | <sup>13</sup> C3N2                  | 0.47 | 0.36             | 0.17                |



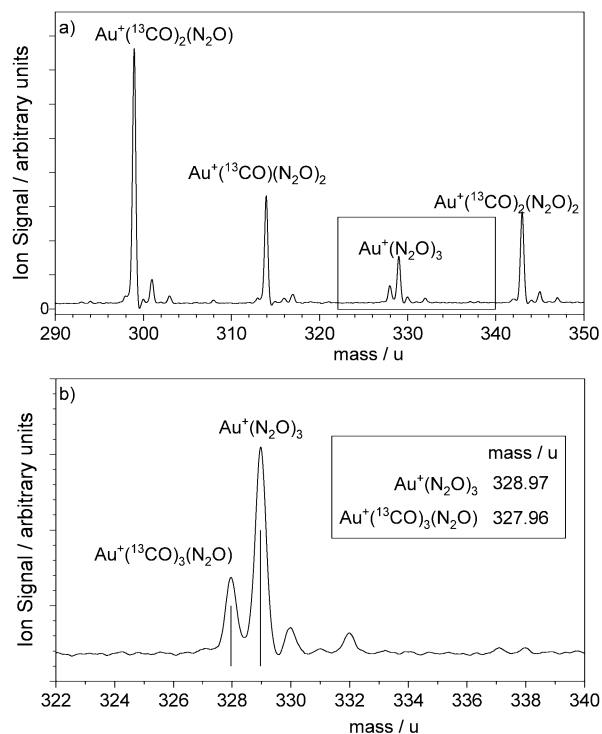

**Figure S1:** a) Portion of the time-of-flight mass spectrum of  $\text{Au}(\text{}^{13}\text{CO})_n(\text{N}_2\text{O})_m^+$  complexes produced by laser ablation of a gold target in presence of a carrier gas comprising 1%  $^{13}\text{C}$ O and 5%  $\text{N}_2\text{O}$  in Ar, illustrating clear mass resolution of the peaks of interest. b) The spectrum around  $m/z = 330$  u showing internal consistency of the calibration performed to the major peaks observed in the spectrum. *n.b.*, both a) and b) are shown before application of the quadrupole mass filter used for mass selectivity prior to action spectroscopy.

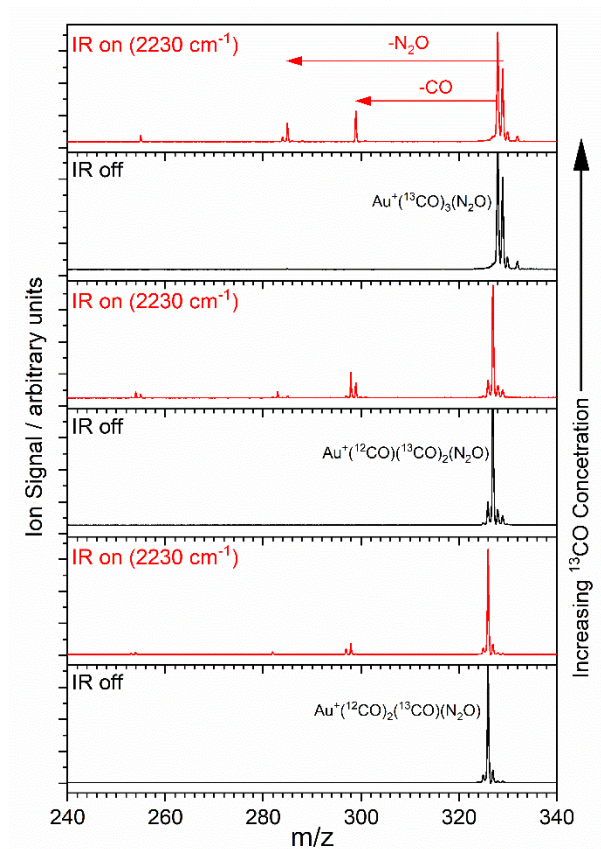

**Figure S2:** Representative parent ion and 2230  $\text{cm}^{-1}$  photofragment mass spectra for different  $^{12}\text{CO}:^{13}\text{CO}$  ratios in the region of the  $\text{Au}^+(\text{CO})_3(\text{N}_2\text{O}) / \text{Au}^+(\text{N}_2\text{O})_3$  parent cluster ions. *n.b.* the parent ion distribution (black) reflects both the gas mix and quadrupole mass selectivity, which are optimized for the species of interest. The upper panels represent the near 100%  $^{13}\text{CO}$  mix whose full mass spectrum (without mass selection) is shown in Figure S1.

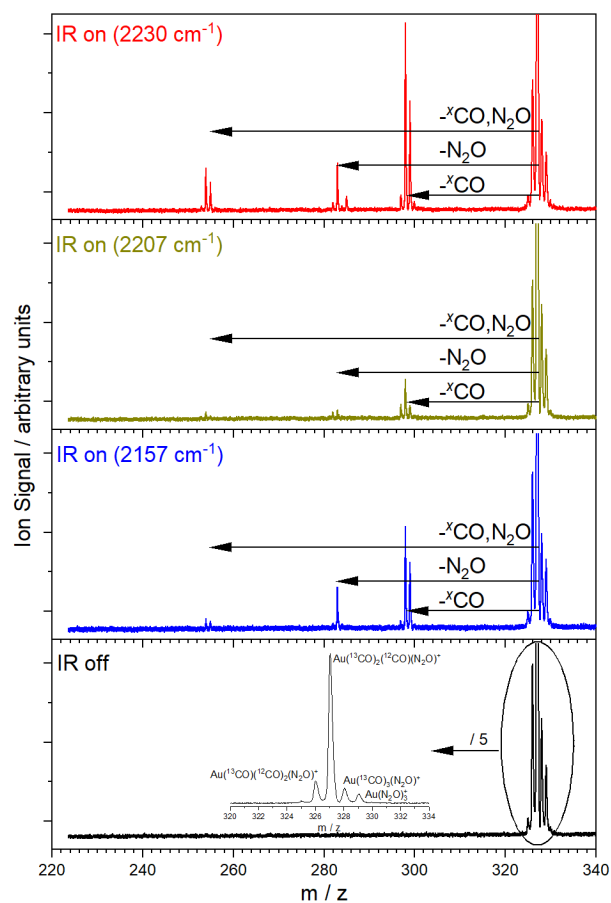

**Figure S3:** Representative mass spectra of the  $\text{Au}^{(13/12\text{CO})_3(\text{N}_2\text{O})^+}$  with IR off (black) and illustrating mass spectra following photofragmentation at  $2157\text{ cm}^{-1}$  (blue),  $2207\text{ cm}^{-1}$  (yellow), and  $2230\text{ cm}^{-1}$  (red). *n.b.* the parent ion distribution (black) reflects both the gas mix and quadrupole mass selectivity, which are optimized for the species of interest.

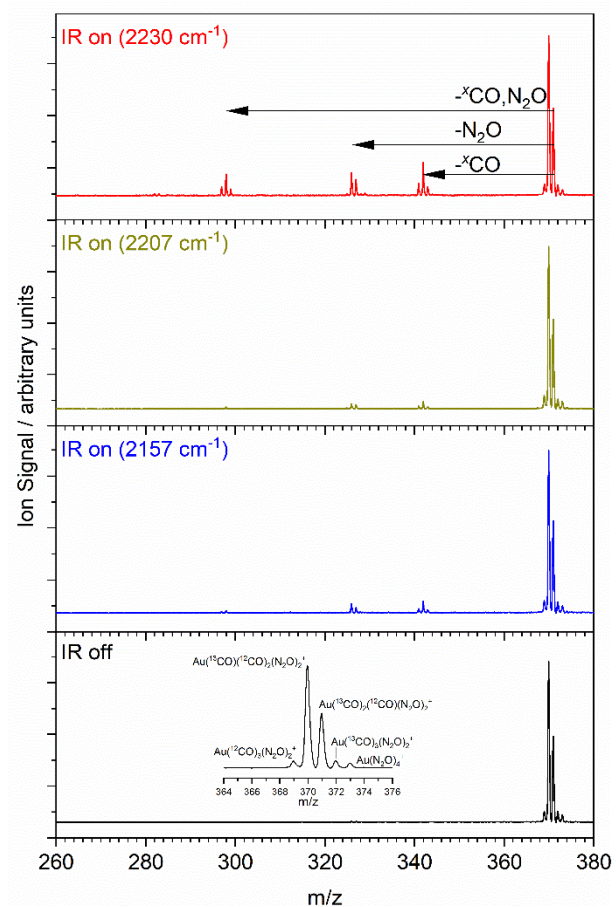

**Figure S4:** Representative mass spectra of the  $\text{Au}({}^{13/12}\text{CO})_3(\text{N}_2\text{O})_2^+$  with IR off (black) and illustrating mass spectra following photofragmentation at  $2157\text{ cm}^{-1}$  (blue),  $2207\text{ cm}^{-1}$  (yellow), and  $2230\text{ cm}^{-1}$  (red). *n.b.* the parent ion distribution (black) reflects both the gas mix and quadrupole mass selectivity, which are optimized for the species of interest.

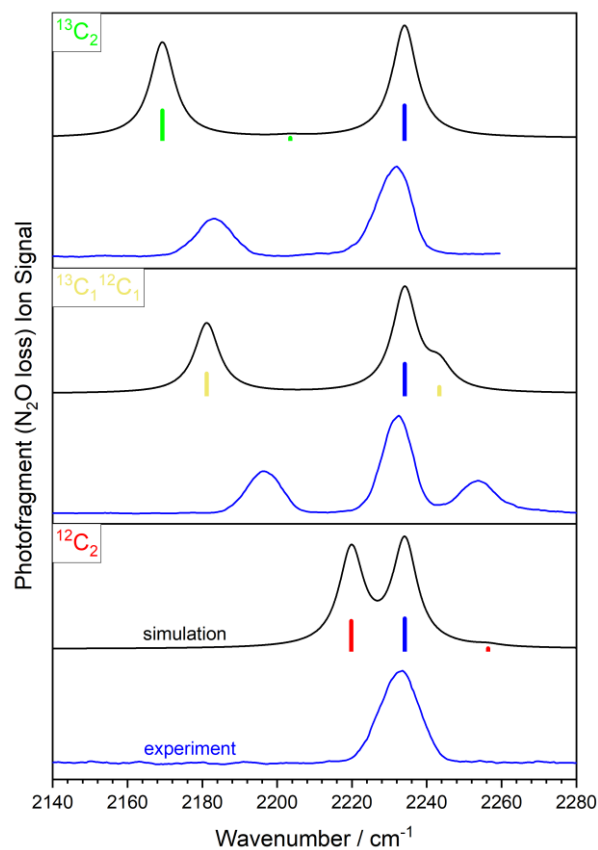

**Figure S5:** Comparison of experimental and simulated infrared action spectra of  $\text{Au}({}^{13/12}\text{CO})_2(\text{N}_2\text{O})^+$  complexes. Modes associated with  $\text{N}_2\text{O}$  are scaled with respect to the  $\text{N}=\text{N}$  stretch in free  $\text{N}_2\text{O}$  stretch ( $2223.5\text{cm}^{-1}$ ,  $\text{SF} = 0.9322$ ) and  $\text{CO}$  modes are scaled to the free  $\text{CO}$  stretch ( $2143.2\text{cm}^{-1}$ ,  $\text{SF} = 0.9626$ ).

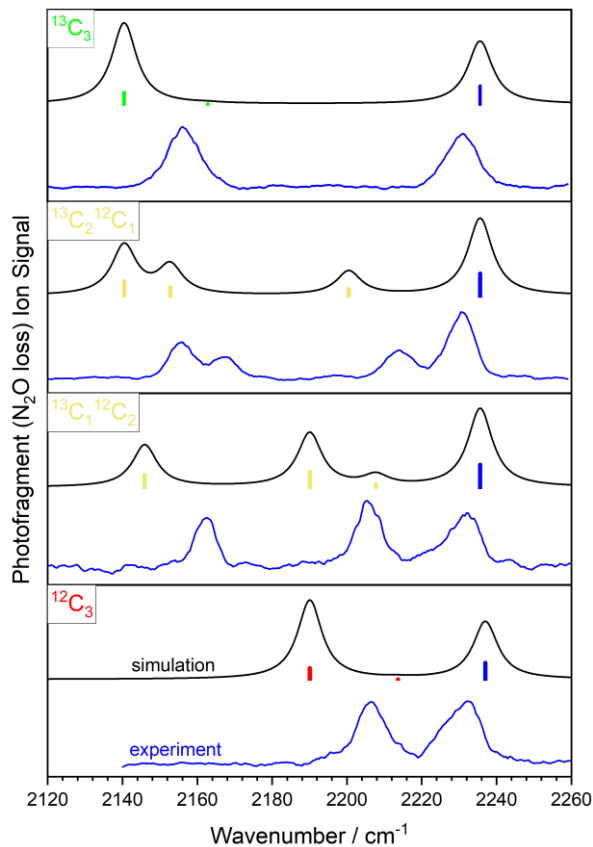

**Figure S6:** Comparison of experimental and simulated infrared action spectra of  $\text{Au}({}^{13/12}\text{CO})_3(\text{N}_2\text{O})^+$  complexes. Modes associated with  $\text{N}_2\text{O}$  are scaled with respect to the  $\text{N}=\text{N}$  stretch in free  $\text{N}_2\text{O}$  stretch ( $2223.5\text{cm}^{-1}$ ,  $\text{SF} = 0.9322$ ) and  $\text{CO}$  modes are scaled to the free  $\text{CO}$  stretch ( $2143.2\text{cm}^{-1}$ ,  $\text{SF} = 0.9626$ ).

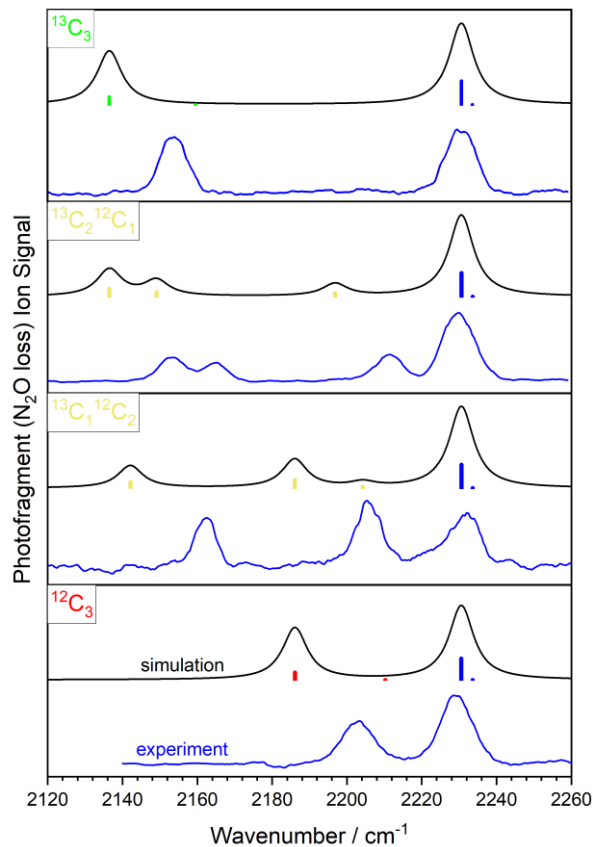

**Figure S7:** Comparison of experimental and simulated infrared action spectra of  $\text{Au}({}^{13/12}\text{CO})_3(\text{N}_2\text{O})_2^+$  complexes. Modes associated with  $\text{N}_2\text{O}$  are scaled with respect to the  $\text{N}=\text{N}$  stretch in free  $\text{N}_2\text{O}$  stretch ( $2223.5\text{cm}^{-1}$ ,  $\text{SF} = 0.9322$ ) and  $\text{CO}$  modes are scaled to the free  $\text{CO}$  stretch ( $2143.2\text{cm}^{-1}$ ,  $\text{SF} = 0.9626$ ).

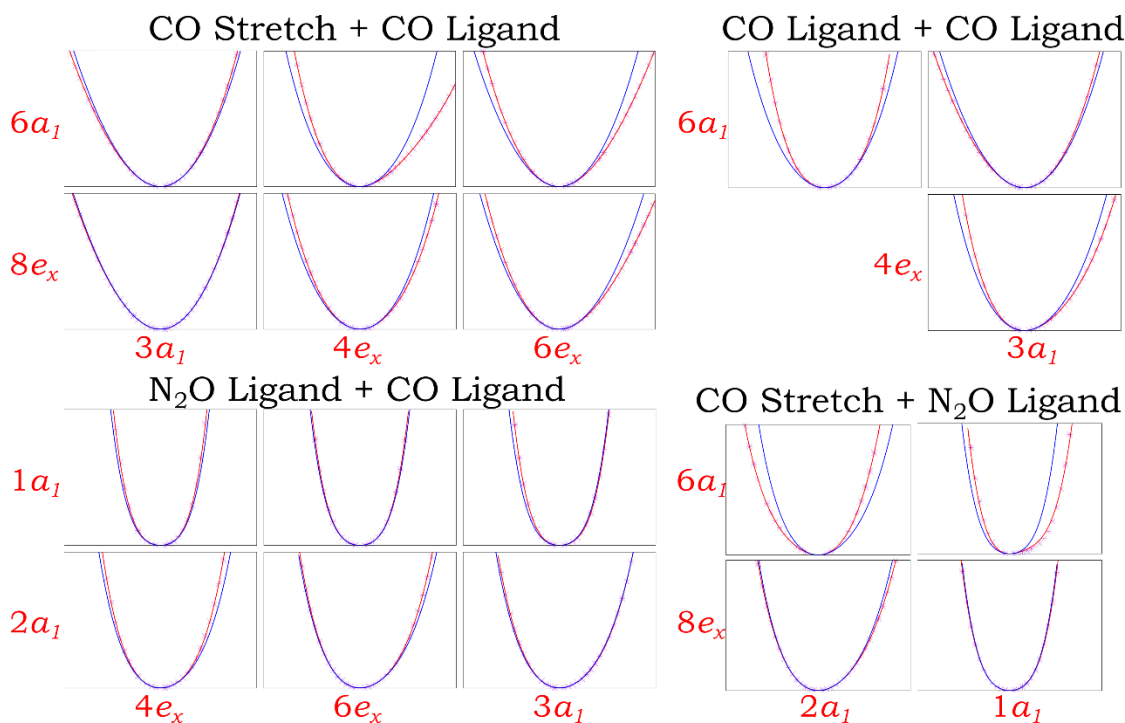

**Figure S8:** Potential energy surface cuts along the positive quadrant of two modes. These modes belong to pairs of sets of modes that have significant coupling. Correlated and uncorrelated models fitted to the data are also plotted. The purple stars indicate the ab-initio points, the blue line corresponds to the value of the uncorrelated 1-mode fit, whilst the red line to that of the correlated model fit.

The following is an expanded description of the vibrational coupling analysis detailed in the main text. The IR-pumped first vibrational excited state will heat the rest of the system via anharmonic terms in the potential energy surface. Although the system will undergo substantial geometric changes upon dissociation, the early transfer of energy away from  $v = 1$  will likely be driven by small anharmonic coupling terms. Table S3 shows the harmonic frequencies for the  $^{12}\text{C}^{13}\text{N}$  system. Naturally, the number of degrees of freedom (DOF) involved in CO ligand motion (9) is larger than for N<sub>2</sub>O (4). To analyse the coupling between modes, whilst keeping the analysis tractable, we have selected subsets of modes. These naturally describe; the N<sub>2</sub>O stretch (2  $a_1$  modes), N<sub>2</sub>O ligand (2  $a_1$  modes), the CO stretch (1  $a_1$  and 1  $e$  mode) and the CO Ligand motion of the CO aligned with the x-axis (1  $a_1$  and 2  $e$  modes). We evaluated hundreds of ab-initio points along each of the linear cuts of all symmetrically unique quadrants of all possible pairs in the aforementioned subset, as well (quasi random) sobol-sampled the same correlated space. We used mass and frequency scaled normal mode coordinates to approximately place all displacements into a similar domain. We then fitted a cluster expansion of symmetry-adapted polynomial functions to the calculated data. For doubly degenerate  $e$  modes, we included both degenerate terms; for example,  $e \times e$  is a four-dimensional correlated space. Most clusters require between fourth to sixth order polynomials to fit the data with minimal error (average RMSD  $< 10^{-5}$  eV). Figure S5 shows PES cuts along the positive quadrant for some of the more significant pairs of correlated coordinates for the domain  $(-0.22, 0.22)$  bohr  $\text{amu}^{-1}$  and range up to 0.5 eV. The purple stars indicate the ab-initio points, the blue line corresponds to the value of the uncorrelated 1-mode fit, whilst the red line to that of the correlated model fit. The discrepancy between the two lines gives a *qualitative* assessment of the degree of correlation between the modes; we found that



the extent of the discrepancy along this quadrant is reasonably representative of the entire correlated space. To better quantify the extent of correlation between these modes, we calculated the Boltzmann-sampled root mean squared deviation (RMSD) between the correlated and uncorrelated models. This is done for each possible pair of modes. We used a sampling temperature of 150 K. Table 1 (in the main text) shows the average RMSD values of the mode-pairs, for each possible pair of subsets. This provides us with a more quantitative measure of the extent of coupling between the differing types of motion.
